# Supplementary figures and images for: Effectiveness of Collaborative Care for Depression in Public-Sector Primary Care Clinics Serving Latinos
Source: Atypon-hosted journal article supplement (doi:10.1176/appi.ps.201600187), 2016-11-15

**Figure 1: PACT Patients Screening, Enrollment and 16-week Follow-up**

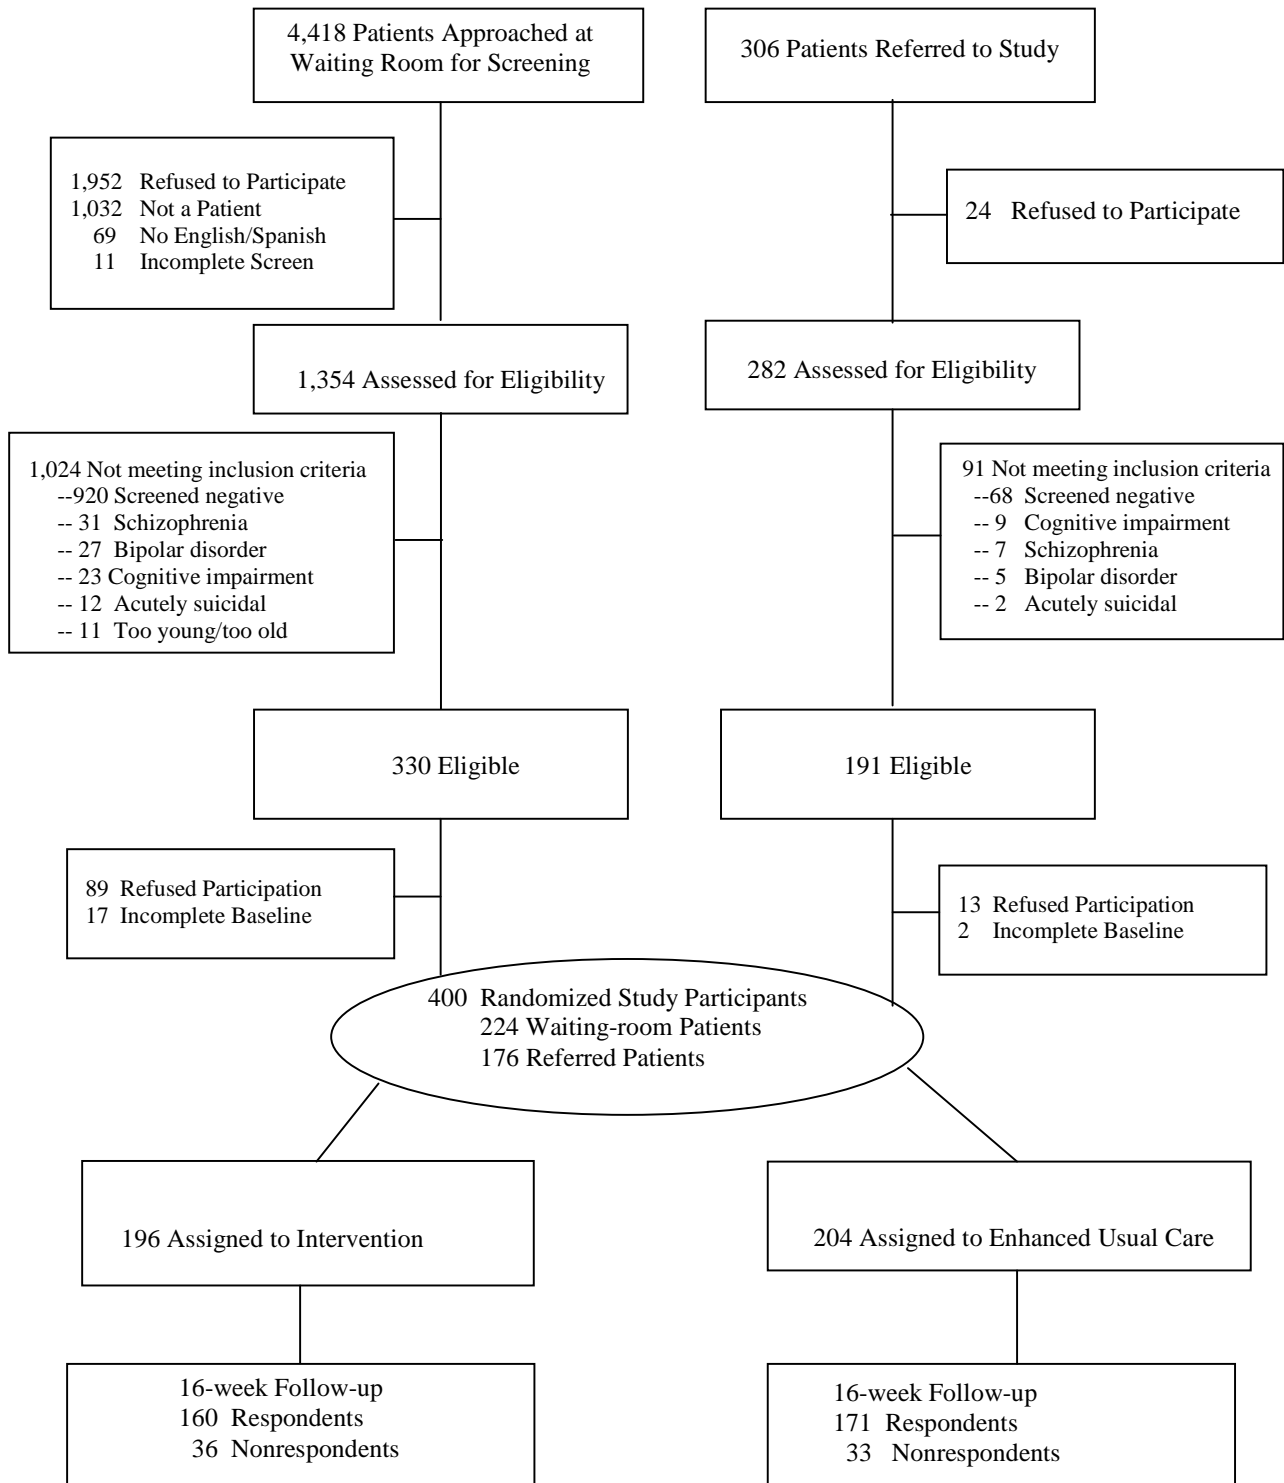

Supplement: appi.ps.201600187.ds001.pdf [file appi.ps.201600187.ds001.pdf]
